# Supplementary material
Source: PubMed Central journal article supplement (PMC3919554)
Supplement: NIHMS549952-supplement-1.pdf [file NIHMS549952-supplement-1.pdf]

## Supplemental Materiel

### Supplemental Table 1 Primer Sequence:

| Name                    | Sequence                                                        |
|-------------------------|-----------------------------------------------------------------|
| Angiopoietin            | F: 5'CTCGTCAGACATTCATCATCCAG3'<br>R: 5'CACCTTCTTTAGTGCAAAGGCT3' |
| SFRP2                   | F: 5'CCCTCATGAGCTCTGACCAT3'<br>R: 5'TATTTGAGGGCATCATGCAA3'      |
| SFRP1                   | F: 5'CGAGTTTGCCTGAGGATGA3'<br>R: 5'CGTTCTTCAGGAACAGCACAA3'      |
| SPP1<br>(osteopontin)   | F: 5'TCCCTCGATGTCATCCCTGTTG3'<br>R: 5'GGCACTCTCCTGGCTCTCTTTG3'  |
| WNT3a                   | F: 5'TTTGGAGGAATGGTCTCTCG3'<br>R: 5'ACCACCAGCAGGTCTTCACT3'      |
| CXCL12                  | F: 5'TGCATCAGTGACGGTAAACCA3'<br>R: 5'CACAGTTTGGAGTGTTGAGGAT3'   |
| CDH2                    | F: 5'TCCACCTCGCTGTAAAAATGG3'<br>R: 5'CATGCAAAAAACCTGAATCCAA3'   |
| BMP4                    | F: 5'TAAGAAGTCCGTCGCCATT3'<br>R: 5'GGCCACAATCCAATCATTCC3'       |
| MMN<br>(nestin)         | F: 5'GCCTCAGACATAGGTGGGATG3'<br>R: 5'CCCCTTGCCTAATACCCTTGA3'    |
| LEF1                    | F: 5'GCCACCGATGAGATGATCCC3'<br>R: 5'TTGATGTCGGCTAAGTCGCC3'      |
| PPAR-GAMMA              | F: 5'ACCACTCGCATTCTTTGAC3'<br>R: 5'TGGGTCAGCTCTTGTGAATG3'       |
| C/EBP ALPHA             | F: 5'CATCAGCGCCATCATCGACC3'<br>R: 5'CCAGGAAGTTCGTCGTTGAAG3'     |
| Alkaline<br>phosphatase | F: 5'GAGCGTCATCCCAGTGGAG3'<br>R: 5'TAGCGGTTACTGTAGACACCC3'      |
| RUNX2                   | F: 5'AGAGTCAGATTACAGATCCCAGG3'<br>R: 5'AGGAGGGGTAAGACTGGTCATA3' |
| Osteocalcin             | F: 5'CTGACCTCACAGATCCCAAGC3'<br>R: 5'TGGTCTGATAGCTCGTCACAAG3'   |
| SHH                     | F: 5'AAAGCTGACCCCTTTAGCCTA3'<br>R: 5'TTCGGAGTTTCTTGTGATCTTCC3'  |
| Beta actin              | F: 5'GCTCTTTTCCAGCCTTCCTT3'<br>R: 5'CTTCTGCATCCTGTCAGCAA3'      |

**Supplemental Table 2: p190-B-deficiency causes erythropoiesis defects at e14.5**

|                             | P1          | P2          | P3         | P4        | P5          |
|-----------------------------|-------------|-------------|------------|-----------|-------------|
| frequency                   |             |             |            |           |             |
| +/+                         | 2.5±0.3     | 4.12±0.72   | 57±7.7     | 13.9±4.52 | 1.35±0.34   |
| +/-                         | 2.78±0.5    | 3.9±0.86    | 58±5.7     | 14±5.39   | 1.29±0.65   |
| -/-                         | 3.17±0.35*  | 5.24±0.85*  | 54±5.7     | 8.5±3.12* | 0.55±0.3*   |
| total cell number per liver |             |             |            |           |             |
| +/+                         | 0.33±0.039  | 0.54±0.095  | 7.56±1.01  | 1.87±0.6  | 0.18±0.045  |
| +/-                         | 0.37±0.062  | 0.52±0.11   | 7.68±0.75  | 1.86±0.71 | 0.17±0.086  |
| -/-                         | 0.17±0.019* | 0.29±0.046* | 2.97±0.33* | 1.47±0.17 | 0.03±0.016* |

P1: Ter119<sup>low</sup>CD71<sup>low</sup>; P2: Ter119<sup>low</sup>CD71<sup>high</sup>; P3: Ter119<sup>high</sup>CD71<sup>high</sup>; P4: Ter119<sup>high</sup>CD71<sup>Int.</sup>; P5: Ter119<sup>high</sup>CD71<sup>low</sup>, profile of various erythropoietic population according to (REF). \* p<0.05, n=7-9

Note that the frequency of P1 and P2 population were increased in p190-B<sup>-/-</sup> fetal liver whereas the frequency of P4 and P5 population were decreased; overall the total numbers of erythroid cells at various stage of differentiation were decreased in p190-B<sup>-/-</sup> fetal livers compared to WT

**Supplemental Table 3: Blood parameters of the 10% of p190-B haploinsufficient adult animals that live shortly**

|                                  | +/+                | +/-                |
|----------------------------------|--------------------|--------------------|
| WBC ( $10^3/\mu\text{l}$ )       | 9.398 $\pm$ 1.098  | 9.142 $\pm$ 2.062  |
| Gr1/Mac1 (%)                     | 15.7 $\pm$ 5.9     | 36.1 $\pm$ 24.7*   |
| B220 (%)                         | 50.5 $\pm$ 8.4     | 30.4 $\pm$ 15.5*   |
| T cells (%)                      | 22.5 $\pm$ 3.1     | 24 $\pm$ 9.5       |
| RBC ( $10^6/\mu\text{l}$ )       | 8.859 $\pm$ 0.4366 | 10.15 $\pm$ 0.534  |
| Hb (g/L)                         | 13.54 $\pm$ 0.65   | 15.39 $\pm$ 0.8872 |
| Platelets ( $10^6/\mu\text{l}$ ) | 731.8 $\pm$ 63.14  | 758.7 $\pm$ 62.21  |

WBC: white blood cell, RBC: red blood cells, Hb: hemoglobin,  
Gr1/Mac1: granulocytes/monocytes, B220: B lymphocytes, T cells: T lymphocytes  
\* p<0.05, n=8

## Supplemental figure legends

### Supplemental Figure 1.

**(A)** Weight and **(B)** cellularity (cell number per liver) of e14.5 fetal livers. **(C)** Fetal liver cell size assessed by forward scatter parameter measurement using flow cytometry.

### Supplemental Figure 2.

Representative flow cytometry chart of erythroid differentiation profile assessed by Ter119 and CD71 expression from BM cells of WT recipients reconstituted with WT or p190-B<sup>-/-</sup> FL cells.

### Supplemental Figure 3.

Transplantation of WT cells in WT and p190-B heterozygotes mice that live normally.

**(A)** Total number of cells per BM (right panel) and spleen (left panel). **(B)** Frequency of LSK-SLAM, LSK and LK progenitors, **(C)** Frequency of B cell (B220+) and granulomonocytic cells (Gr-1+CD11b+) in BM. (mean±SD, n=8-10 from 2 independent experiments).

### Supplemental Figure 4

Analyses of cultured-derived stromal cells **(A)** Representative pictures of cultured-derived stromal cells. **(B)** Representative flow analyses of expression of markers of MSCs. **(C)** qPCR analysis of the mRNA expression of putative MSC markers in the stromal cells. Data are expressed as log<sub>2</sub> fold relative to average of WT samples set to 0. n=3-4 samples per group, each triangle represents one independent sample.

### Supplemental Figure 5

Flow chart of the analysis of immunophenotypic markers of stromal cells in the fetal liver.

### **Supplemental Figure 6**

**(A)** Number of CFU-F per e14.5 fetal livers (mean±SD, n=4). **(B)** Immunophenotypic characterization of e14.5 fetal liver stromal cells, (mean±SD, n=8).

### **Supplemental Figure 7**

Masson's trichrome staining adult femur from of WT and p190-B heterozygotes that live shortly, enlarged pictures (representative of n=3). Note the decrease in collagen deposition indicated by lighter blue intensity in p190-B heterozygotes.

### **Supplemental Figure 8**

qPCR analysis of mRNA expression of the indicated genes. Data are expressed as log<sub>2</sub> fold relative to average of WT samples set to 0. \*p<0.05 Mann-Whitney test, n=3-4 samples per group, each triangle represents one independent sample

### **Supplemental Figure 9**

Alizarin red and alcian blue staining of skeleton at e18.5. Arrow points to visible skeletal defects, which were observed in each of the p190-B<sup>-/-</sup> embryos examined (n=5 per genotypes).

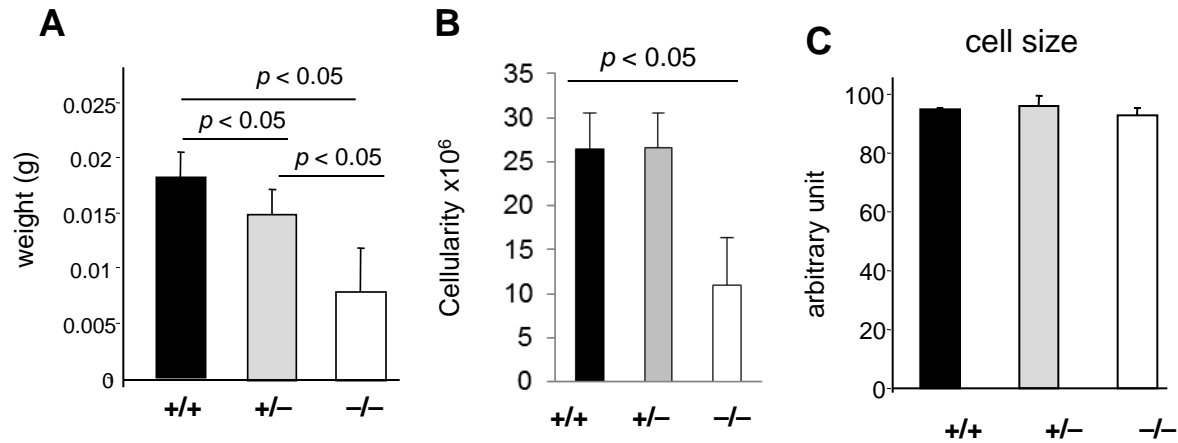

Supplemental figure 1

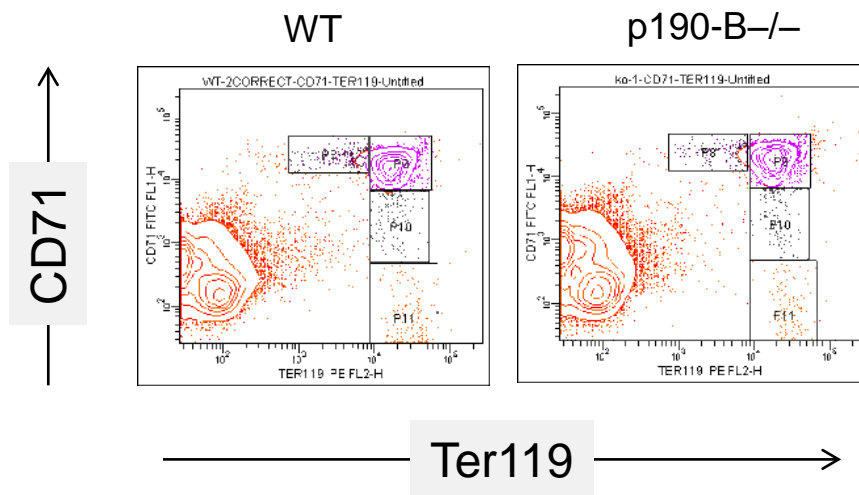

Supplemental figure 2

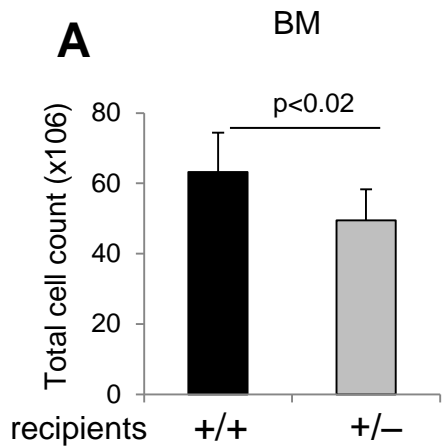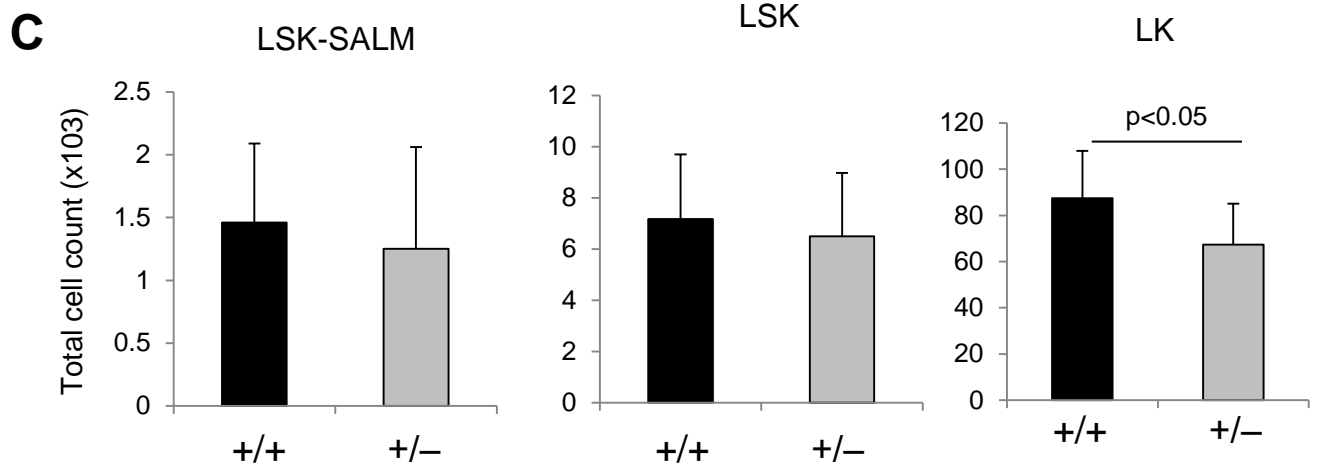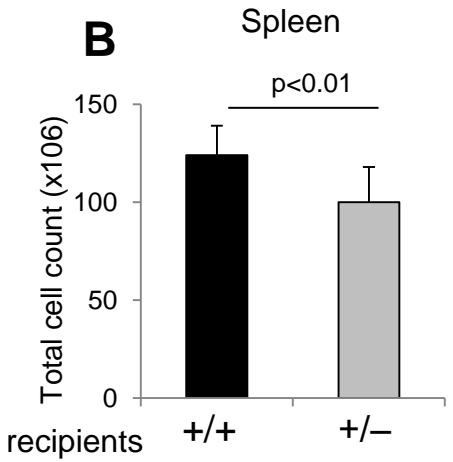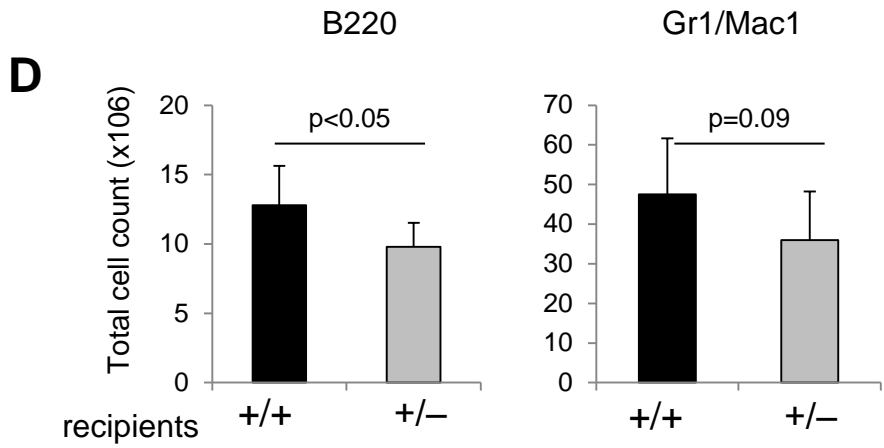

Supplemental Figure 3



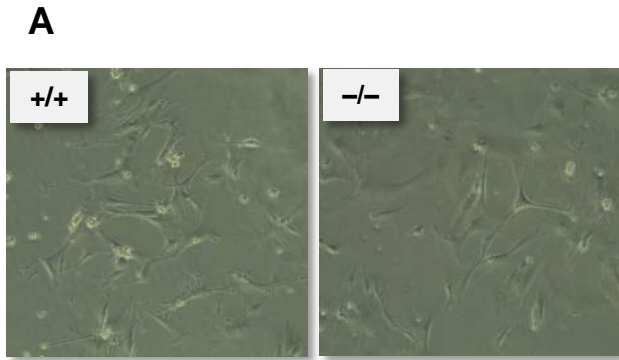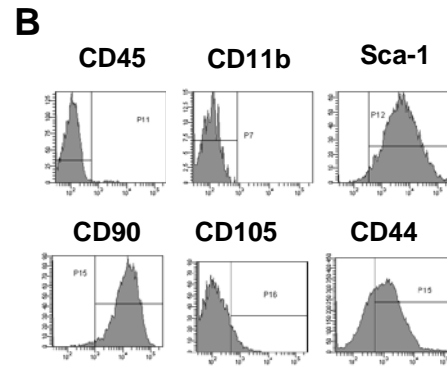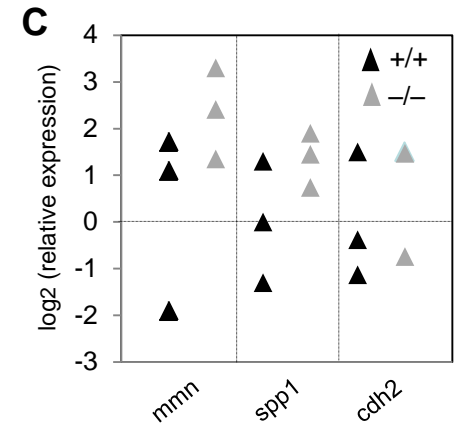

Supplemental figure 4

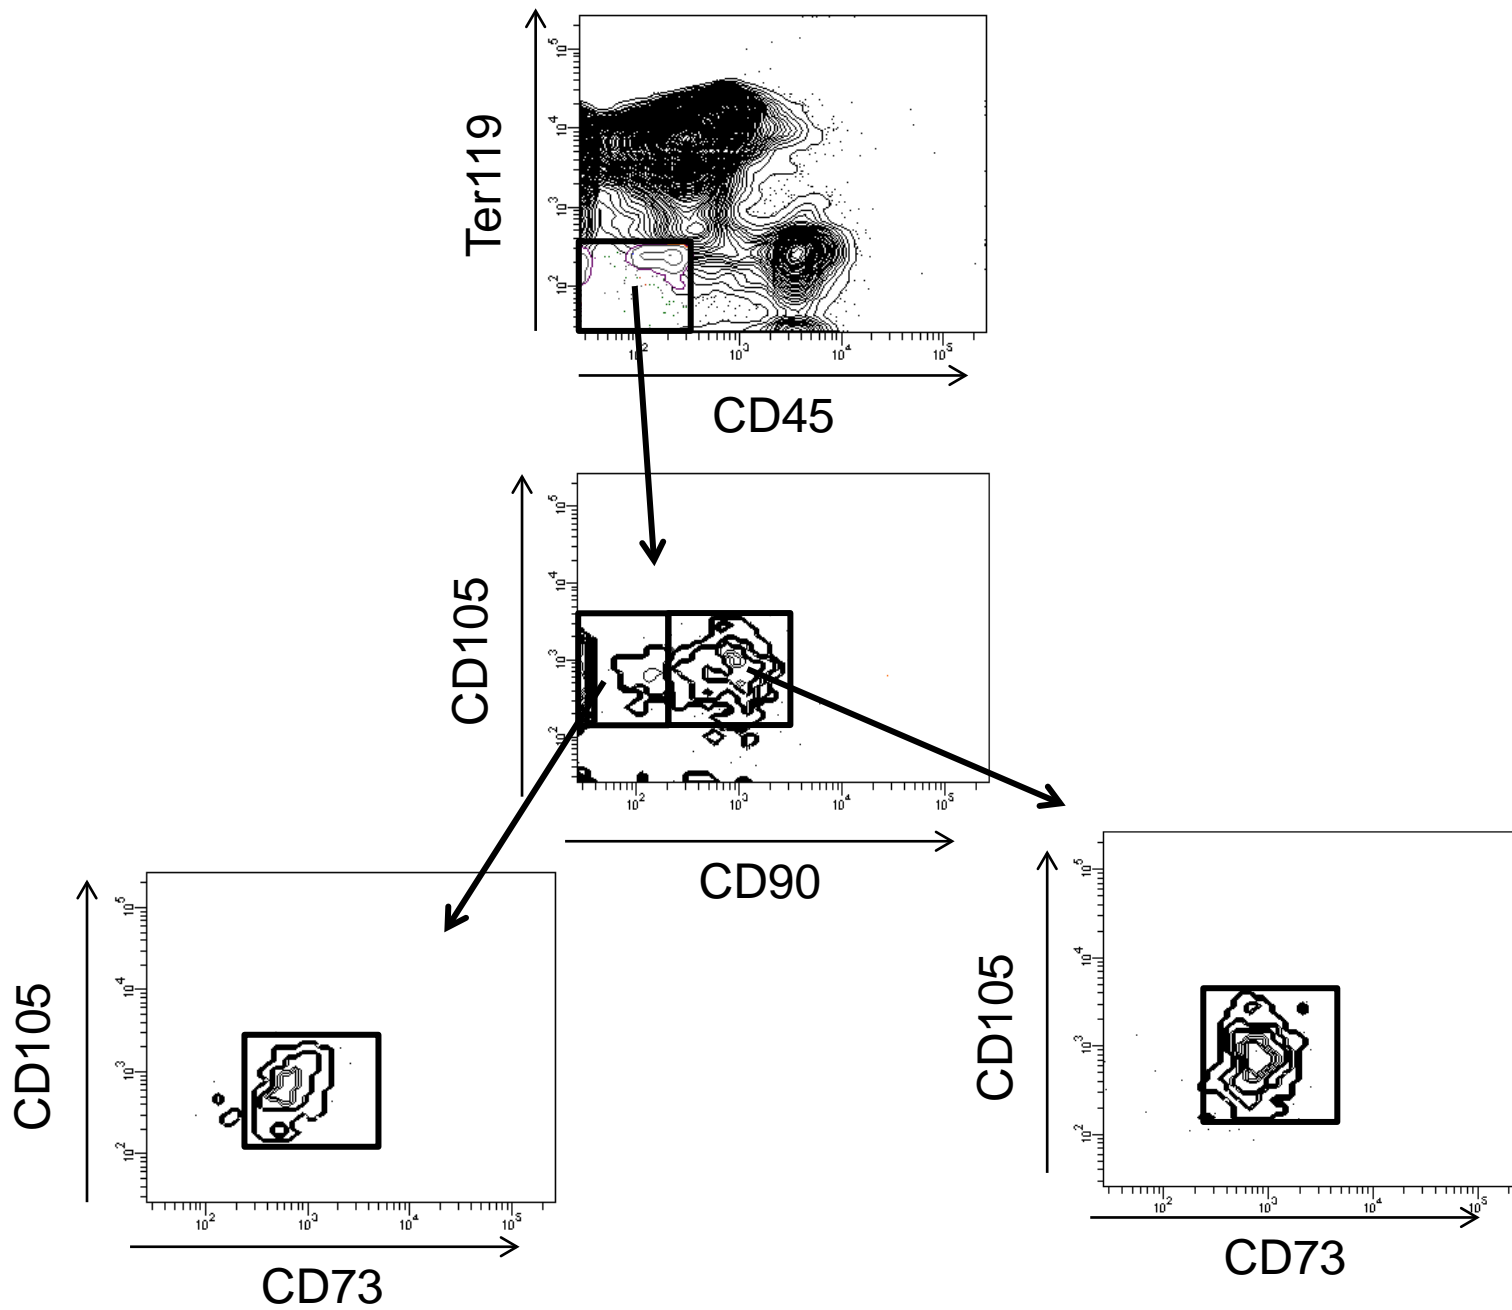

Supplemental Figure 5

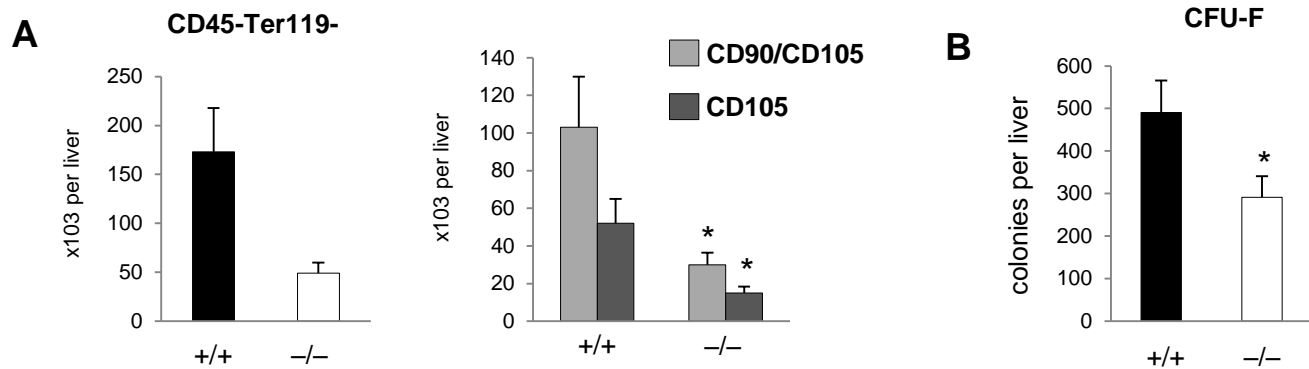

Supplemental Figure 6

**+/+**

**+/-**

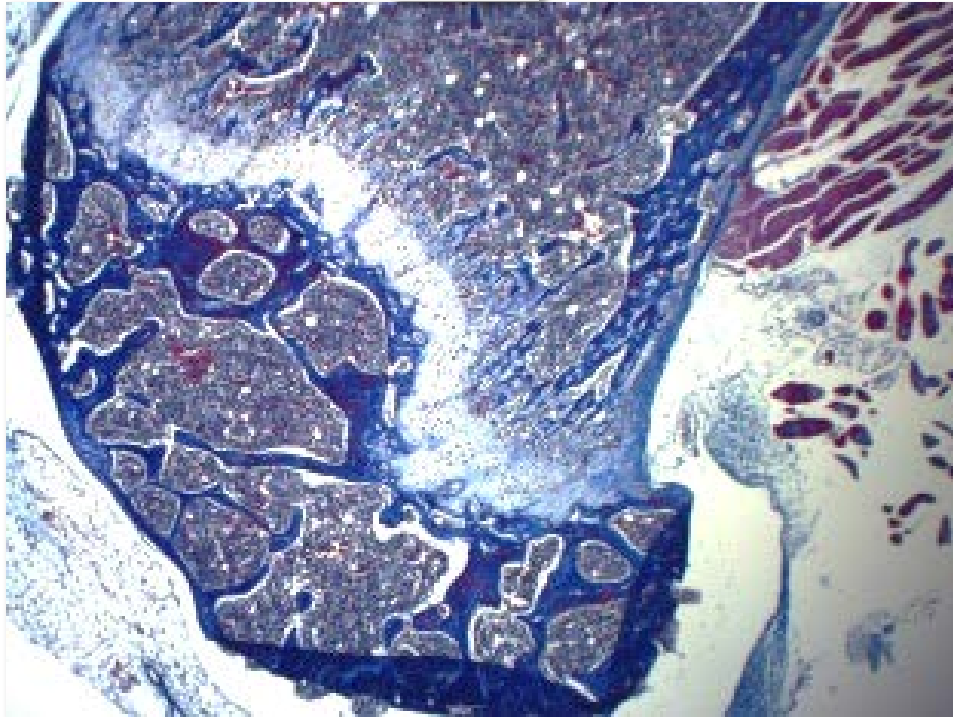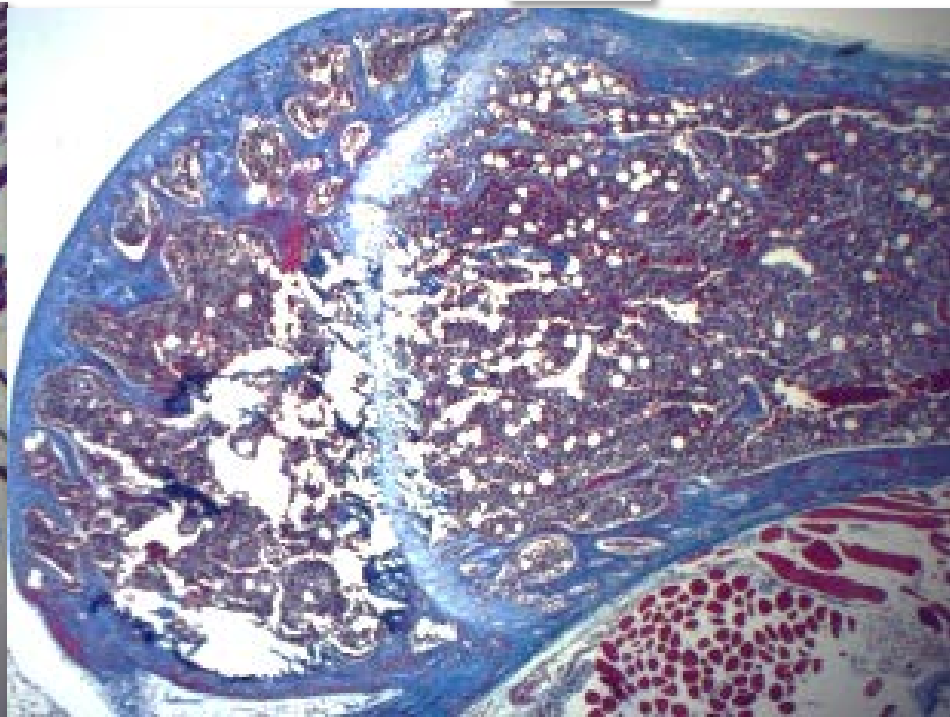

Supplemental Figure 7

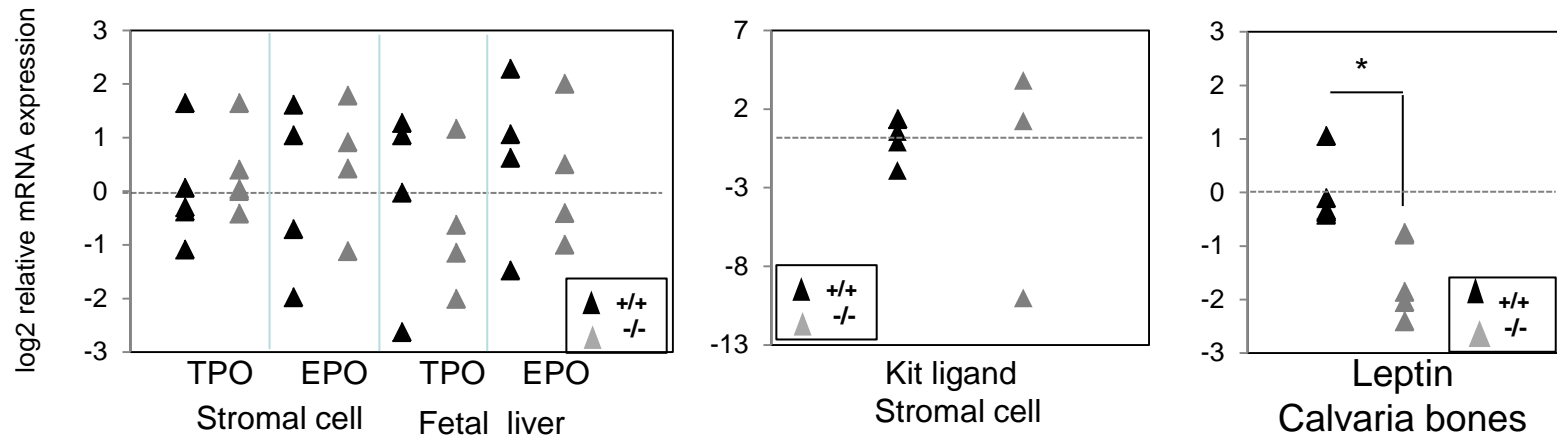

Supplemental Figure 8

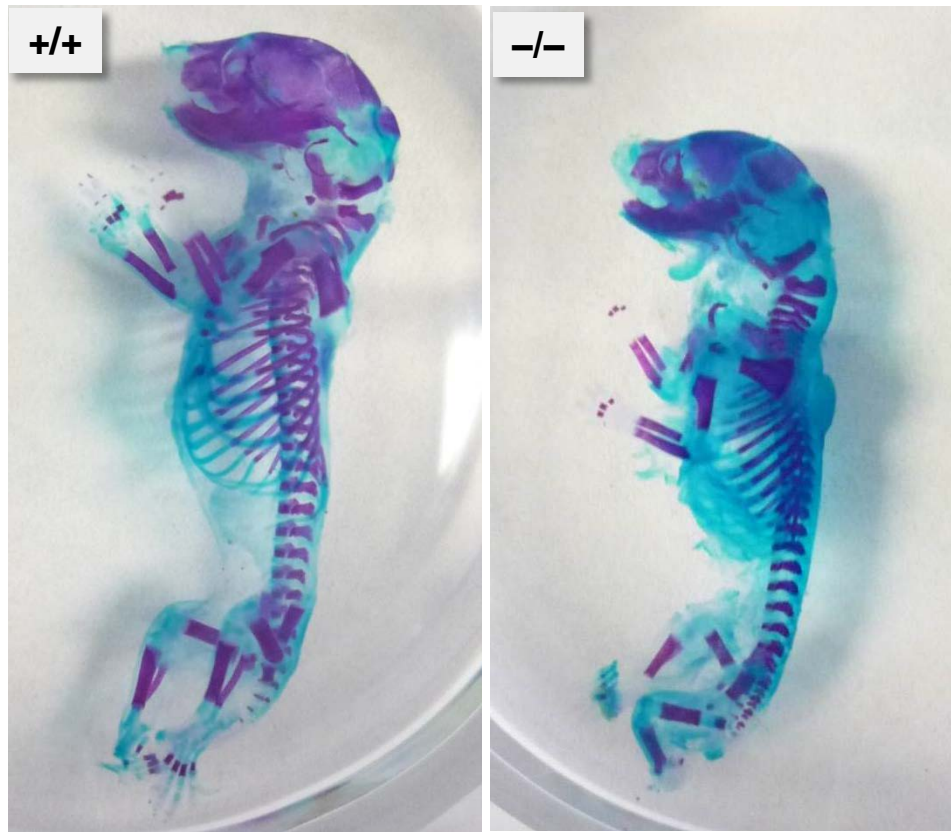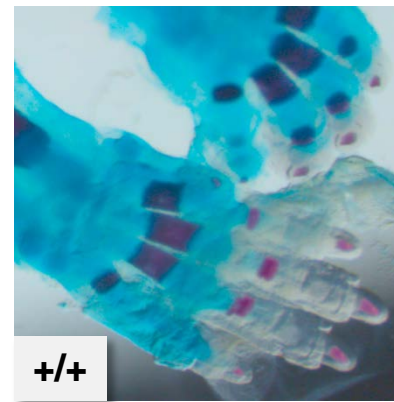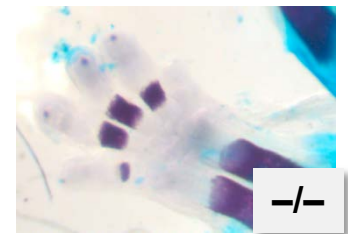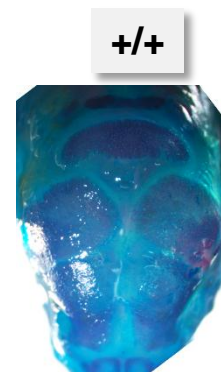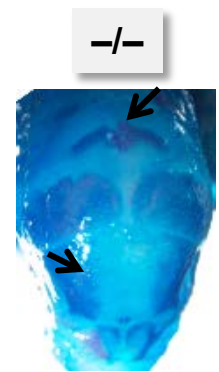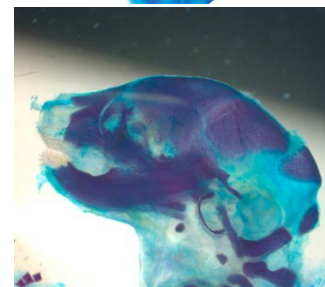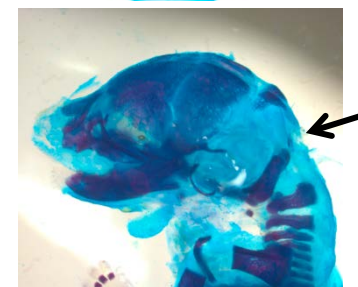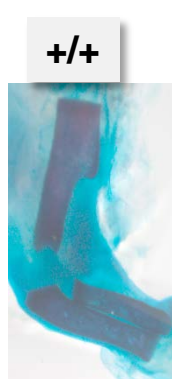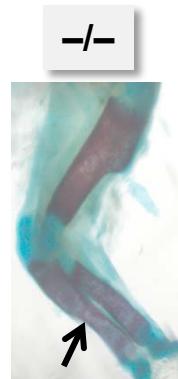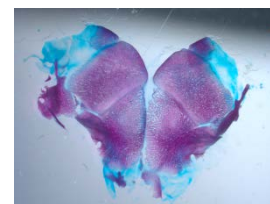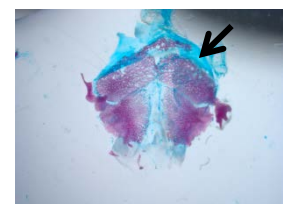

Supplemental figure 9
